# Supplementary material for: Pb isotope analysis on Phoenix-ATONA: assessment and minimisation of uncertainties
Source: Royal Society of Chemistry journal article supplement (doi:10.1039/d6ja00002a), 2026-01-01
Supplement: d6ja00002a3.xlsx [file d6ja00002a3.xlsx]

## Sheet: S2 Supp table
Supplementary table S2. Pb isotopic data																		Uncert expansion =		2
			Compositional Parameters												Isotopic Ages			Sample (Radiogenic + Initial Pb) Isotope Ratios
		Wt.	U	Pb	206Pb*	mol %	Pb*	Pbc	Pbtot	U	206Pb	208Pb	208Pb		207Pb			207Pb		204Pb		corr. coef.		1.02003			Ion Yield
Sample		mg	ppm	ppm	x10-13 mol	206Pb*	Pbc	(pg)	(pg)	(pg)	204Pb	204Pb	206Pb		206Pb	±		206Pb	% err	206Pb	% err	7/6-4/6		F(202/205)	1 SE		Pb [%]	U [%]
(a)		(b)	(c)	(c)	(e)	(e)	(e)	(e)			(f)	(f)			(i)	(h)		(j)	(h)	(j)	(h)
L2025-08 B01 SRM981+DD3		6	0.00988148	0.119645	-0.885843	-0.105873	-0.0533168	758.38	717.87	59.2889	16.9091	36.6373	2.16672					0.914647	0.00317912	0.0591399	0.0177998	-0.496719		1.00061	0.00524866		7.44988	0.012835
L2025-08 B02 SRM981+DD3		6	0.00988148	0.119666	-0.882841	-0.105503	-0.0529287	758.205	717.998	59.2889	16.9148	36.6548	2.16703					0.914668	0.00393481	0.0591202	0.0173334	-0.201288		1.0006	0.00495561		8.14926	0.012835
L2025-08 B04 SRM981+DD3		6	0.00988148	0.119654	-0.882962	-0.105524	-0.052986	758.172	717.924	59.2889	16.9145	36.6511	2.16684					0.914669	0.00282558	0.0591208	0.0151209	-0.111629		1.00065	0.00683968		14.8896	0.012835
L2025-16 B01 SRM 981+DD3 Merck		2	0.024724	0.0895374	-0.217197	-0.104069	-0.0517087	188.86	179.075	49.4481	16.9368	36.7028	2.16704					0.914665	0.00652117	0.059043	0.0280765	0.0494315		1.00065	0.00431894		8.48902	0.015402
L2025-16 B02 SRM 981+DD3 Merck		2	0.024724	0.0895427	-0.217299	-0.10412	-0.0516701	188.863	179.085	49.4481	16.936	36.7056	2.16731					0.914761	0.0110945	0.0590457	0.0469055	-0.192755		1.00077	0.00348685		3.05989	0.015402
L2025-16 B04 SRM 981+DD3 Merck		2	0.024724	0.0895383	-0.217994	-0.104453	-0.052011	188.922	179.077	49.4481	16.9309	36.6908	2.16709					0.91472	0.00650661	0.0590635	0.0229401	-0.0660218		1.00064	0.00460075		7.93819	0.015402
L2025-16 B06 SRM 981+DD3 Merck		2	0.024724	0.0895254	-0.21774	-0.104338	-0.0519868	188.89	179.051	49.4481	16.9327	36.6906	2.16685					0.914642	0.00718355	0.0590573	0.0185892	0.0124943		1.0006	0.00443062		8.65829	0.015402
L2025-37 B11 SRM981 + DD3		5	0.00987982	0.0350529	-0.213161	-0.104364	-0.0518885	184.876	175.265	49.3991	16.932	36.6962	2.16728					0.914787	0.0085451	0.0590609	0.0360205	-0.0588017		1.00068	0.00938354		6.96143	0.015402
L2025-42 B19 SRM981+DD3		5	0.00987982	0.0355425	-0.215884	-0.104238	-0.0518113	187.443	177.712	49.3991	16.9339	36.6998	2.16724					0.914697	0.00700081	0.0590541	0.022955	-0.0189058		1.00062	0.00495243		8.68976	0.015402
L2025-46 B12 SRM981+DD3		5	0.00987982	0.0355363	-0.216995	-0.10477	-0.0524736	187.541	177.681	49.3991	16.9257	36.6693	2.16648					0.914531	0.00700977	0.0590826	0.0226177	0.105913		1.0004	0.00629994		10.7712	0.015402
L2025-25 B03 SRM981+DD3 2-step		7	0.00988267	0.0350648	-0.299316	-0.104655	-0.052003	258.946	245.454	69.1787	16.9276	36.6974	2.1679					0.914721	0.0196216	0.0590758	0.102352	-0.258651		1.00056	0.00768654		0.726031	0.0110014
L2025-25 B03 SRM981+DD3 Daly		7	0.00983413	0.0350895	-0.294141	-0.10279	-0.0502428	258.648	245.626	68.8389	16.9562	36.7714	2.16861					0.914787	0.0233097	0.0589761	0.0537183	-0.484416		1.00196	0.0102526		0.854499	0.0110014
Average											16.9267	36.6814	2.16707					0.914683	11	0.0590785
SD											0.0192261	0.0479469	0.000746423					0.000136904		6.70407e-05
SD%											0.113584	0.130712	0.0344439					0.0149674		0.113477
L2025-08 B05 SRM982+DD3		6	0.00988148	0.0627172	3.57762	0.490765	0.237021	304.261	376.303	59.2889	36.7206	36.7242	1.0001					0.46708	0.00497299	0.0272326	0.023758	0.0787562		1.00061	0.00591079		7.65055	0.012835
L2025-08 B06 SRM982+DD3		6	0.00988148	0.0627085	3.57619	0.490617	0.236609	304.32	376.251	59.2889	36.71	36.7105	1.00001					0.467051	0.00389677	0.0272405	0.0157297	0.115838		1.00062	0.0046685		10.7692	0.012835
L2025-08 B07 SRM982+DD3		6	0.00988148	0.0627178	3.57741	0.490738	0.236968	304.277	376.307	59.2889	36.7187	36.7233	1.00013					0.467076	0.00429391	0.027234	0.0231376	0.0560815		1.00069	0.00363986		8.43586	0.012835
L2025-08 B08 SRM982+DD3		6	0.00988148	0.0627078	3.57583	0.490566	0.236468	304.351	376.247	59.2889	36.7063	36.7057	0.999985					0.467043	0.00385371	0.0272432	0.0177097	-0.0592297		1.00059	0.00629355		10.6923	0.012835
L2025-13 B13 SRM982+DD3 Aldrich		5	0.00988962	0.103866	4.93435	0.490395	0.235951	420.268	519.328	49.4481	36.694	36.6876	0.999827					0.466988	0.00381476	0.0272524	0.0176314	-0.134603		1.00074	0.0130288		10.3986	0.015402
L2025-13 B14 SRM982+DD3 Aldrich		5	0.00988962	0.103861	4.93663	0.490631	0.236486	420.066	519.304	49.4481	36.7109	36.7024	0.999768					0.466985	0.00321646	0.0272398	0.0105776	-0.102048		1.00087	0.0114697		15.9893	0.015402
L2025-13 B15 SRM982+DD3 Aldrich		5	0.00988962	0.10386	4.93474	0.490455	0.236076	420.201	519.299	49.4481	36.6982	36.6904	0.999785					0.466995	0.00269801	0.0272492	0.0143219	-0.105404					14.1628	0.015402
L2025-13 B16 SRM982+DD3 Aldrich		5	0.00988962	0.103873	4.93559	0.490476	0.236127	420.237	519.365	49.4481	36.6998	36.6914	0.999771					0.467007	0.00277738	0.0272481	0.0237281	-0.131222		1.00095	0.00921704		12.5375	0.015402
L2025-16 B03 SRM 982+DD3 Merck		2	0.024724	0.123089	2.34083	0.490789	0.23695	199.059	246.178	49.4481	36.7223	36.7183	0.999892					0.46703	0.00426261	0.0272313	0.0202107	0.0792066		1.00067	0.0056801		11.4162	0.015402
L2025-16 B05 SRM 982+DD3 Merck		2	0.024724	0.123074	2.33968	0.490607	0.236505	199.106	246.147	49.4481	36.7092	36.7044	0.999869					0.467035	0.00618862	0.027241	0.0224045	-0.0975049		1.0006	0.0068023		9.55611	0.015402
L2025-16 B07 SRM 982+DD3 Merck		2	0.024724	0.123096	2.34036	0.490695	0.236805	199.093	246.191	49.4481	36.7156	36.7163	1.00002					0.467061	0.00546451	0.0272363	0.0231758	0.077043		1.00062	0.00418218		8.93136	0.015402
L2025-16 B08 SRM 982+DD3 Merck		2	0.024724	0.12309	2.3403	0.490682	0.236718	199.099	246.181	49.4481	36.7146	36.7125	0.999941					0.46703	0.00658033	0.027237	0.0212918	-0.191786		1.00063	0.00429774		8.45317	0.015402
L2025-36 B07 Spike calib 07 DD3+RP6		9.74	1.95031	0.394919	36.5879	0.490942	0.237282	3109.45	3846.51	18996	36.7333	36.7277	0.999848					0.466995	0.00342007	0.0272227	0.00722202	0.320302		1.00128	0.00185149		2.31446	0.0555461
L2025-36 B08 Spike calib 08 DD3+RP6		9.5	1.99111	0.403164	36.4329	0.490969	0.237362	3095.95	3830.06	18915.5	36.7352	36.7313	0.999893					0.466983	0.00289014	0.0272213	0.00651009	0.406671		1.00078	0.0075529		3.79569	0.0347568
L2025-36 B10 Spike calib 10 DD3+RP6		19.74	1.86674	0.377958	70.9743	0.490978	0.23735	6030.93	7460.9	36849.4	36.736	36.7296	0.999827					0.466979	0.00207388	0.027221	0.00428843	0.0857498		1.00103	0.00327478		3.12966	0.0264509
L2025-36 B11 Spike calib 11 DD3+RP6		30.41	1.84451	0.373411	108.014	0.49094	0.237263	9179.68	11355.4	56091.6	36.7332	36.7271	0.999833					0.466983	0.00218568	0.0272231	0.00583583	-0.43295		1.0013	0.00265049		1.30663	0.0169069
L2025-36 B12 Spike calib 12 DD3+RP6		30.16	1.85303	0.375132	107.64	0.491024	0.237442	9144.83	11314	55887.5	36.7393	36.7325	0.999815					0.466958	0.00214125	0.0272186	0.00483328	-0.279582		1.00117	0.00325242		2.27899	0.0137972
L2025-52 B01 SRM982+DD2		50	0.033031	0.632849	300.966	0.490936	0.237318	25578.4	31642.4	1651.55	36.7329	36.7304	0.999932					0.467018	0.00162873	0.0272235	0.00311523	0.368037		1.00093	0.00623978		6.8366
L2025-52 B02 SRM982+DD2		50	0.033031	0.632826	300.928	0.490901	0.237257	25578.8	31641.3	1651.55	36.7304	36.7289	0.99996					0.467035	0.00235052	0.0272253	0.00430075	-0.348032		1.00073	0.00643331		6.73322
L2025-52 B03 SRM982+DD2		50	0.033031	0.63277	300.902	0.490875	0.237128	25579.2	31638.5	1651.55	36.7285	36.7234	0.999861					0.467001	0.00191363	0.0272267	0.00399844	0.42972		1.0007	0.0089584		11.5213
L2025-52 B04 SRM982+DD2		50	0.033031	0.632784	300.924	0.490905	0.237213	25578	31639.2	1651.55	36.7307	36.7263	0.999879					0.467008	0.00177043	0.0272251	0.0036235	0.340868		1.00061	0.00931867		7.74679
Average all											36.72	36.7164	0.999902					0.467016	21	0.027233
SD											0.020131	0.0181212	0.000129722					6.17971e-05		1.5124e-05
SD%											0.0548229	0.0493544	0.0129735					0.0132323		0.0555355
Average small (0.25-0.52 ng)											36.71	36.7073	0.999924					0.467032	12	0.0272405
SD											0.0181627	0.0251705	0.000250173					6.5444e-05		1.34996e-05
SD%											0.0494762	0.068571	0.0250192					0.0140128		0.0495572
Average medium (3.8-11.3 ng)											36.7354	36.7296	0.999843					0.46698	5	0.0272213
SD											0.00493767	0.00456896	6.01531e-05					2.70614e-05		3.5171e-06
SD%											0.0134412	0.0124394	0.00601626					0.00579499		0.0129204
Average large loads (L2025-52, 32 ng)											36.7307	36.7273	0.999908					0.467016	4	0.0272251
SD											0.00359181	0.00615803	9.19831e-05					2.91347e-05		2.66228e-06
SD%											0.00977878	0.0167669	0.00919916					0.00623849		0.00977874
L2025-14 B01 ET1x+DD3 Merck		5	0.00868665	0.0150743	1.86147	0.992042	60.5995	1.22559	75.3714	43.4333	2342.44	749.191	0.319833		4559.66	0.180763		0.623643	0.012403	0.000403042	3.64001	0.777411		1.00072	0.00785371		10.488	0.0549228
L2025-14 B02 ET1x+DD3 Merck		5	0.00759442	0.015077	1.8615	0.991938	59.8081	1.24176	75.385	37.9721	2312.27	739.811	0.31995		4559.58	0.217631		0.623631	0.0149106	0.000408618	3.61563	0.640718		1.00077	0.00509668		2.65314	0.003203
L2025-14 B03 ET1x+DD3 Merck		5	0.00865523	0.0150738	1.86128	0.991988	60.1812	1.23393	75.369	43.2762	2326.53	744.148	0.319853		4559.64	0.196875		0.623647	0.0134985	0.000405962	3.61448	0.71429		1.00077	0.00717529		9.34326	0.0133407
L2025-14 B04 ET1x+DD3 Merck		5	0.00865419	0.0150735	1.86111	0.991932	59.761	1.24244	75.3674	43.271	2310.55	739.079	0.319872		4559.62	0.175974		0.623652	0.0120764	0.000408936	3.59381	0.79706		1.00065	0.0086823		7.41502	0.0211172
L2025-14 B05 ET1x+DD3 Aldrich		5	0.00812219	0.0141773	1.74936	0.991616	57.4886	1.21396	70.8864	40.6109	2223.36	712.283	0.320363		4559.67	0.195983		0.623735	0.0134409	0.000424398	3.67748	0.762505		1.00102	0.00839572		8.41216	0.0303735
L2025-14 B06 ET1x+DD3 Aldrich		5	0.0081202	0.0141766	1.74926	0.991583	57.2542	1.21879	70.8832	40.601	2214.51	709.434	0.320356		4559.57	0.197333		0.623698	0.0135323	0.000426195	3.6587	0.758244		1.00094	0.00830189		11.5292	0.0423632
L2025-14 B07 ET1x+DD3 Aldrich		5	0.00815401	0.0141794	1.74925	0.991512	56.7773	1.22909	70.8968	40.77	2196.14	703.856	0.320497		4559.77	0.187714		0.623798	0.0128781	0.000429977	3.63105	0.794876		1.00111	0.0061455		7.27521	0.00666862
L2025-14 B08 ET1x+DD3 Aldrich		5	0.00819032	0.0141779	1.74898	0.991443	56.3117	1.23894	70.8893	40.9516	2178.52	698.162	0.320475		4559.68	0.21457		0.623774	0.0147025	0.000433659	3.60065	0.69682		1.00125	0.00409992		4.62231	0.0054546
L2025-22 B07 ET1x+DD3		5	0.00805969	0.0139942	1.72809	0.992056	60.7044	1.13584	69.9711	40.2984	2346.07	750.436	0.319869		4559.66	0.195016		0.623633	0.0133813	0.000400539	3.94672	0.776075		1.00062	0.00508891		12.1628	0.0231125
L2025-22 B08 ET1x+DD3		5	0.00805442	0.0139917	1.72786	0.992083	60.9086	1.13189	69.9584	40.2721	2353.87	752.852	0.319835		4559.65	0.195038		0.623625	0.013383	0.000399121	3.95896	0.776351		1.00065	0.00767227		14.3628	0.0381937
L2025-22 B09 ET1x+DD3		5	0.00807003	0.0140079	1.72875	0.99184	59.0932	1.16743	70.0393	40.3501	2284.07	731.875	0.320426		4559.92	0.270822		0.62379	0.0185394	0.000412129	3.87222	0.552281		1.00094	0.0121509		2.06682	0.0345464
L2025-22 B10 ET1x+DD3		5	0.00805804	0.013999	1.72836	0.991995	60.2385	1.14488	69.9952	40.2902	2328.1	745.007	0.320006		4559.86	0.219271		0.623734	0.015031	0.000403836	3.92011	0.689106		1.00076	0.00360695		4.85608	0.0481973
L2025-37 B12 ET1X + DD3		5	0.00860211	0.014904	1.83802	0.991138	54.3417	1.34876	74.5198	43.0106	2103.96	673.976	0.320336		4559.75	0.271999		0.623873	0.0185996	0.00045117	3.57156	0.480763		1.00068	0.0112314		2.76635	0.0377903
L2025-38 B15 A193 ET1x+DD3		5	0.0086	0.01491	1.84059	0.991939	59.8234	1.2277	74.5499	43	2312.44	740.267	0.320124		4559.89	0.194855		0.623761	0.0133618	0.000408316	3.63552	0.728427		1.00079	0.00319861		8.3521	0.0817785
L2025-38 B16 A193 ET1x+DD3		5	0.00862102	0.0149129	1.84073	0.991911	59.6229	1.232	74.5644	43.1051	2304.62	738.017	0.320233		4560.02	0.215685		0.623825	0.0147792	0.000409785	3.62955	0.656295		1.00074	0.00470451		3.9104	0.00988297
L2025-46 B09 ET1x+DD3		5	0.00903761	0.0156787	1.93502	0.991811	58.8878	1.31116	78.3935	45.1881	2276.86	729.259	0.320292		4559.94	0.198697		0.623815	0.0136164	0.000416257	3.41288	0.675077		1.00078	0.00318634		5.57252	0.106243
L2025-46 B10 ET1x+DD3		5	0.00902853	0.0156989	1.93541	0.991272	55.2214	1.39846	78.4943	45.1427	2136.53	686.26	0.321203		4559.91	0.200668		0.623917	0.0137438	0.000445133	3.16699	0.672809		1.00081	0.00396976		6.13371	4.39594e-10
L2025-46 B11 ET1x+DD3		5	0.00902738	0.0156833	1.93513	0.991655	57.7753	1.33637	78.4166	45.1369	2234.45	715.969	0.320423		4559.9	0.208957		0.623831	0.0143126	0.000424601	3.33125	0.644416		1.00067	0.00497593		3.28443	0.0226708
L2025-25 B01 ET1x+DD3 Daly		7	0.00858602	0.0149133	2.57782	0.991943	59.8689	1.71788	104.393	60.1022	2315.66	740.665	0.31985		4559.84	0.266184		0.623767	0.0181998	0.000414616	2.7776	0.380731		1.00196	0.00303303		3.07982	0.00961147
L2025-25 B01 ET1x+DD3 2-step		7	0.00858602	0.0148991	2.57561	0.992005	60.3385	1.7031	104.294	60.1022	2333.58	746.492	0.319891		4559.63	0.158577		0.623662	0.0108662	0.000411283	2.76746	0.643597		1.00045	0.00470113		6.8685	0.00961147
Average											2271.73	727.352	0.320184		4559.76			0.623741	20	0.000416879
SD											165.057	51.5469	0.000781815		0.231924			0.00018054		3.42809e-05
SD%											7.26572	7.08692	0.244176		0.00508632			0.0289448		8.22324
